# Supplementary material
Source: HighWire-hosted journal article supplement (https://bmjopenquality.bmj.com/highwire/filestream/136218/field_highwire_adjunct_files/1/ds2195.docx)

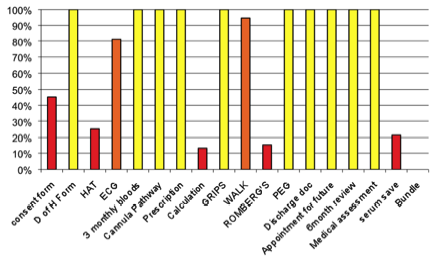

Supplement: ds2195.docx [file ds2195.docx]
